# Supplementary material for: Food Preservatives Induce Proteobacteria Dysbiosis in Human-Microbiota Associated Nod2-Deficient Mice
Source: Microorganisms. 2019 Sep 23;7(10):383. doi: 10.3390/microorganisms7100383 (PMC6843281; doi:10.3390/microorganisms7100383)
Supplement: Supplementary file 1 [file microorganisms-07-00383-s001.xlsx]

## Sheet: Sheet1
Table S1. Full taxonomies of significant balances (y0 and y2) in both wild-type and Nod2-/- samples.
wild-type; y0 denominator
Feature ID	0	1	2	3	4	5	6
17fdda78730bfacccea7d1b032ad0de9	k__Bacteria	p__Firmicutes	c__Clostridia	o__Clostridiales	f__Lachnospiraceae	g__	s__
c016d7dfa3b6d4108112ec0a5fc2b5c5	k__Bacteria	p__Firmicutes	c__Clostridia	o__Clostridiales	f__Veillonellaceae	g__Megamonas	s__
715f6fca7b27231c100da6d6cb0aba00	k__Bacteria	p__Firmicutes	c__Clostridia	o__Clostridiales	f__Lachnospiraceae	f__Lachnospiraceae	f__Lachnospiraceae
9953a8c3c48c23fc28829a69d9d6ba5f	k__Bacteria	p__Firmicutes	c__Clostridia	o__Clostridiales	f__Ruminococcaceae	g__	s__
4608cf2aa614ad44e2e4c90e5145221e	k__Bacteria	p__Firmicutes	c__Clostridia	o__Clostridiales	f__Clostridiaceae	g__Clostridium	s__
bb4cb74a1c44bbe7d5b215abf892a7ab	k__Bacteria	p__Firmicutes	c__Clostridia	o__Clostridiales	f__Ruminococcaceae	g__Oscillospira	s__
234bf32fce47fa60264cfb36d9ccb8c4	k__Bacteria	p__Bacteroidetes	c__Bacteroidia	o__Bacteroidales	f__Bacteroidaceae	g__Bacteroides	s__
36200c608f7904607b28943b9bc4be39	k__Bacteria	p__Firmicutes	c__Clostridia	o__Clostridiales	f__Ruminococcaceae	g__Faecalibacterium	s__prausnitzii
32d1b8c1e13d30df0aaa7f3d5db08681	k__Bacteria	p__Firmicutes	c__Clostridia	o__Clostridiales	f__Lachnospiraceae	g__Anaerostipes	s__
ac98d5a0d989eb469a93db5e9b3c7fd4	k__Bacteria	p__Firmicutes	c__Clostridia	o__Clostridiales	f__Ruminococcaceae	g__Oscillospira	s__
0968d1591fc1e301e4a872e2d7cdc336	k__Bacteria	p__Firmicutes	c__Clostridia	o__Clostridiales	f__Lachnospiraceae	g__Clostridium	s__citroniae
b978450e75ae38f47e8e4fadc48bbd0b	k__Bacteria	p__Firmicutes	c__Clostridia	o__Clostridiales	f__Lachnospiraceae	f__Lachnospiraceae	f__Lachnospiraceae
a76bceb8556d98d20da8b2e65d2a974d	k__Bacteria	p__Firmicutes	c__Clostridia	o__Clostridiales	f__Lachnospiraceae	f__Lachnospiraceae	f__Lachnospiraceae
ec921d7c5aced9ea3b9cb88148da2a3f	k__Bacteria	p__Firmicutes	c__Clostridia	o__Clostridiales	f__Peptococcaceae	g__	s__
155ace0850fc88498e3c881bc5252fcc	k__Bacteria	p__Bacteroidetes	c__Bacteroidia	o__Bacteroidales	f__Bacteroidaceae	g__Bacteroides	s__ovatus
015ce998953e085dd4d5011f7edd05e2	k__Bacteria	p__Firmicutes	c__Clostridia	o__Clostridiales	f__Ruminococcaceae	f__Ruminococcaceae	f__Ruminococcaceae
9df251784dde31e05f02b2ee1029d71c	k__Bacteria	p__Firmicutes	c__Clostridia	o__Clostridiales	f__Lachnospiraceae	f__Lachnospiraceae	f__Lachnospiraceae
20a4ef09ca6e01e1cc0421853f672b7e	k__Bacteria	p__Firmicutes	c__Clostridia	o__Clostridiales	f__Lachnospiraceae	g__	s__
8ae299fe8aa39820660e7e6746ff1aae	k__Bacteria	p__Firmicutes	c__Clostridia	o__Clostridiales	f__Lachnospiraceae	f__Lachnospiraceae	f__Lachnospiraceae
ec6c9233b72090035eb87c6ff39a84a7	k__Bacteria	p__Bacteroidetes	c__Bacteroidia	o__Bacteroidales	f__Bacteroidaceae	g__Bacteroides	s__
ef496cf105e32960ab0bc8e8cdec1ab2	k__Bacteria	p__Bacteroidetes	c__Bacteroidia	o__Bacteroidales	f__Bacteroidaceae	g__Bacteroides	s__ovatus
dfc82561fb6ae5e03d37d5250f700a6b	k__Bacteria	p__Proteobacteria	c__Betaproteobacteria	o__Burkholderiales	f__Alcaligenaceae	g__Sutterella	s__
51f7c8ee44363f94d016d6907b20aced	k__Bacteria	p__Bacteroidetes	c__Bacteroidia	o__Bacteroidales	f__Bacteroidaceae	g__Bacteroides	s__ovatus
2907e9783a2b968c95bd0283afe1cbc6	k__Bacteria	p__Bacteroidetes	c__Bacteroidia	o__Bacteroidales	f__Bacteroidaceae	g__Bacteroides	s__
ae57d7598239f2c6b3fa12d4953e6551	k__Bacteria	p__Firmicutes	c__Clostridia	o__Clostridiales	f__Ruminococcaceae	g__Oscillospira	s__
777dafa3e5bad680cc5a2c1418e8b728	k__Bacteria	p__Firmicutes	c__Clostridia	o__Clostridiales	f__Lachnospiraceae	f__Lachnospiraceae	f__Lachnospiraceae
49b7ccdeabd1c0990d7128f676749292	k__Bacteria	p__Firmicutes	c__Clostridia	o__Clostridiales	f__Lachnospiraceae	f__Lachnospiraceae	f__Lachnospiraceae
2555ab896130cd0373de325088a94110	k__Bacteria	p__Firmicutes	c__Clostridia	o__Clostridiales	f__Lachnospiraceae	f__Lachnospiraceae	f__Lachnospiraceae
bbae6ed124f4d6b48435a964a95c8418	k__Bacteria	p__Firmicutes	c__Clostridia	o__Clostridiales	f__Ruminococcaceae	g__Faecalibacterium	s__prausnitzii
2ee657e8d73105fdb87313a047117230	k__Bacteria	p__Firmicutes	c__Clostridia	o__Clostridiales	f__Lachnospiraceae	g__	s__
wild-type; y2 denominator
Feature ID	0	1	2	3	4	5	6
ccb80719aaf6b52bd8256aecd9c2b56c	k__Bacteria	p__Firmicutes	c__Bacilli	o__Turicibacterales	f__Turicibacteraceae	g__Turicibacter	s__
7cd4efa29b942711d9a324e442bd9268	k__Bacteria	p__Firmicutes	c__Clostridia	o__Clostridiales	f__Lachnospiraceae	g__Clostridium	s__citroniae
87e78246820b532cd7477daab3b52ad9	k__Bacteria	p__Bacteroidetes	c__Bacteroidia	o__Bacteroidales	f__Bacteroidaceae	g__Bacteroides	s__uniformis
bb0ec67481c826edfe26490692202c3f	k__Bacteria	p__Firmicutes	c__Clostridia	o__Clostridiales	f__Lachnospiraceae	g__	s__
5859c644498bf396619fcca4ed014b8d	k__Bacteria	p__Bacteroidetes	c__Bacteroidia	o__Bacteroidales	f__Bacteroidaceae	g__Bacteroides	s__ovatus
98fcc7e4135d41152d2db711de5c1255	k__Bacteria	p__Bacteroidetes	c__Bacteroidia	o__Bacteroidales	f__Bacteroidaceae	g__Bacteroides	s__uniformis
ce0837f50ab0a7abc73bddc82e8b55e6	k__Bacteria	p__Bacteroidetes	c__Bacteroidia	o__Bacteroidales	f__Bacteroidaceae	g__Bacteroides	g__Bacteroides
877d5f7d9eb2dafb85b9772f2ad2c5c6	k__Bacteria	p__Firmicutes	c__Clostridia	o__Clostridiales	f__Ruminococcaceae	f__Ruminococcaceae	f__Ruminococcaceae
0eebf22536faa70d10968eb4972b2736	k__Bacteria	p__Proteobacteria	c__Betaproteobacteria	o__Burkholderiales	f__Alcaligenaceae	g__Sutterella	s__
Nod2-deficient; y0 denominator
Feature ID	0	1	2	3	4	5	6
657967aad31527de494561e0ddbf3d20	k__Bacteria	p__Firmicutes	c__Clostridia	o__Clostridiales	f__Lachnospiraceae	g__Clostridium	s__citroniae
2f84e0f713ad12b7f80d875da9bd194a	k__Bacteria	p__Firmicutes	c__Clostridia	o__Clostridiales	f__Ruminococcaceae	g__Butyricicoccus	s__pullicaecorum
c3262a6939558979eb8f52f21d419eef	k__Bacteria	p__Firmicutes	c__Clostridia	o__Clostridiales	f__Lachnospiraceae	f__Lachnospiraceae	f__Lachnospiraceae
8a1f2f6ab957c0fb1255ca0c2bf45943	k__Bacteria	p__Bacteroidetes	c__Bacteroidia	o__Bacteroidales	f__Bacteroidaceae	g__Bacteroides	s__eggerthii
37453085adfe208e105f0236b407f59a	k__Bacteria	p__Bacteroidetes	c__Bacteroidia	o__Bacteroidales	f__Bacteroidaceae	g__Bacteroides	s__caccae
08ed17794e8af08e5f0fb28b4e415a5a	k__Bacteria	p__Firmicutes	c__Clostridia	o__Clostridiales	f__Lachnospiraceae	g__Roseburia	s__
e5520e69c39c46e11d9abb444c6f11a7	k__Bacteria	p__Firmicutes	c__Clostridia	o__Clostridiales	f__Lachnospiraceae	f__Lachnospiraceae	f__Lachnospiraceae
da6b5f4e8d387bf4c29b49db6fadf609	k__Bacteria	p__Bacteroidetes	c__Bacteroidia	o__Bacteroidales	f__Porphyromonadaceae	g__Parabacteroides	s__gordonii
902d8f67d3ef7fec32c8b3b3c1ad0ba3	k__Bacteria	p__Firmicutes	c__Clostridia	o__Clostridiales	f__Lachnospiraceae	f__Lachnospiraceae	f__Lachnospiraceae
ffc36e27c82042664a16bcd4d380b286	k__Bacteria	p__Proteobacteria	c__Gammaproteobacteria	o__Enterobacteriales	f__Enterobacteriaceae	f__Enterobacteriaceae	f__Enterobacteriaceae
8954856044dc31156803857144f6b482	k__Bacteria	p__Proteobacteria	c__Deltaproteobacteria	o__Desulfovibrionales	f__Desulfovibrionaceae	g__Bilophila	s__
973360718cfb0d1806d43527cb25adb3	k__Bacteria	p__Firmicutes	c__Clostridia	o__Clostridiales	f__Lachnospiraceae	g__[Ruminococcus]	s__gnavus
4c3db6ddb4899dbedb3618192f2ad313	k__Bacteria	p__Firmicutes	c__Clostridia	o__Clostridiales	f__Lachnospiraceae	g__Roseburia	s__
971577d146be3b80cdc7fed9a7ef1533	k__Bacteria	p__Firmicutes	c__Clostridia	o__Clostridiales	f__Lachnospiraceae	f__Lachnospiraceae	f__Lachnospiraceae
ce0837f50ab0a7abc73bddc82e8b55e6	k__Bacteria	p__Bacteroidetes	c__Bacteroidia	o__Bacteroidales	f__Bacteroidaceae	g__Bacteroides	g__Bacteroides
aa2725f1e054e9c6528a260c62109654	k__Bacteria	p__Firmicutes	c__Clostridia	o__Clostridiales	o__Clostridiales	o__Clostridiales	o__Clostridiales
2ab424bb8819d10f58e3059611aeb88c	k__Bacteria	p__Firmicutes	c__Clostridia	o__Clostridiales	f__Lachnospiraceae	g__Clostridium	s__symbiosum
af3909edeceab197f554e240fe97af83	k__Bacteria	p__Bacteroidetes	c__Bacteroidia	o__Bacteroidales	f__Rikenellaceae	g__	s__
11ab9631d9670c69d52bdaa9ae52a696	k__Bacteria	p__Firmicutes	c__Erysipelotrichi	o__Erysipelotrichales	f__Erysipelotrichaceae	g__Holdemania	s__
ec6c9233b72090035eb87c6ff39a84a7	k__Bacteria	p__Bacteroidetes	c__Bacteroidia	o__Bacteroidales	f__Bacteroidaceae	g__Bacteroides	s__
5859c644498bf396619fcca4ed014b8d	k__Bacteria	p__Bacteroidetes	c__Bacteroidia	o__Bacteroidales	f__Bacteroidaceae	g__Bacteroides	s__ovatus
b978450e75ae38f47e8e4fadc48bbd0b	k__Bacteria	p__Firmicutes	c__Clostridia	o__Clostridiales	f__Lachnospiraceae	f__Lachnospiraceae	f__Lachnospiraceae
90e9bc60e823aba36dffc54fe72c51e1	k__Bacteria	p__Cyanobacteria	c__4C0d-2	o__YS2	f__	g__	s__
78c2b8e06a58a133919d9e5fd0cd2da1	k__Bacteria	p__Firmicutes	c__Clostridia	o__Clostridiales	f__Lachnospiraceae	g__Clostridium	s__hathewayi
18fa4f1fcf1d163510458788feb297fe	k__Bacteria	p__Firmicutes	c__Erysipelotrichi	o__Erysipelotrichales	f__Erysipelotrichaceae	g__	s__
74f2c3414fa1cb7cec3f66bef71a351b	k__Bacteria	p__Firmicutes	c__Clostridia	o__Clostridiales	f__Lachnospiraceae	g__Coprococcus	s__
44cae38ace30f54ee81cc5c5b2ce47eb	k__Bacteria	p__Bacteroidetes	c__Bacteroidia	o__Bacteroidales	f__Rikenellaceae	g__	s__
d7520dd99322ba43ae4332d331315af1	k__Bacteria	p__Firmicutes	c__Clostridia	o__Clostridiales	o__Clostridiales	o__Clostridiales	o__Clostridiales
b1f914aca311f8af324b2eda493cda68	k__Bacteria	p__Firmicutes	c__Clostridia	o__Clostridiales	f__Ruminococcaceae	g__Ruminococcus	s__
463ccc4044935acfa08235ade550557e	k__Bacteria	p__Bacteroidetes	c__Bacteroidia	o__Bacteroidales	f__Bacteroidaceae	g__Bacteroides	s__eggerthii
b8920d08746c81c9f86f2cdcf65ef81d	k__Bacteria	p__Proteobacteria	c__Deltaproteobacteria	o__Desulfovibrionales	f__Desulfovibrionaceae	g__	s__
ccb80719aaf6b52bd8256aecd9c2b56c	k__Bacteria	p__Firmicutes	c__Bacilli	o__Turicibacterales	f__Turicibacteraceae	g__Turicibacter	s__
09ad3f07c79e7bbc78206689dc55492d	k__Bacteria	p__Firmicutes	c__Clostridia	o__Clostridiales	f__Ruminococcaceae	g__Oscillospira	s__
9243bc95f3bb4eba8fabc522fa335a7f	k__Bacteria	p__Bacteroidetes	c__Bacteroidia	o__Bacteroidales	f__Bacteroidaceae	g__Bacteroides	s__caccae
692908d9e8dc244214e861f18774ffb2	k__Bacteria	p__Firmicutes	c__Clostridia	o__Clostridiales	f__Ruminococcaceae	g__Oscillospira	s__
Nod2-deficient; y2 denominator
Feature ID	0	1	2	3	4	5	6
7ce20dc0d050d5b02daef50d77765562	k__Bacteria	p__Bacteroidetes	c__Bacteroidia	o__Bacteroidales	f__Bacteroidaceae	g__Bacteroides	g__Bacteroides
44cf6fcb8475bf3450f2c54bd7b7cbed	k__Bacteria	p__Firmicutes	c__Clostridia	o__Clostridiales	f__Lachnospiraceae	f__Lachnospiraceae	f__Lachnospiraceae
747a284c95e1af0ec02d6582f6565774	k__Bacteria	p__Firmicutes	c__Clostridia	o__Clostridiales	o__Clostridiales	g__	s__
01526cee3fdf7ad501533f8e79cee802	k__Bacteria	p__Firmicutes	c__Clostridia	o__Clostridiales	f__Lachnospiraceae	f__Lachnospiraceae	f__Lachnospiraceae
b3cca12745b7cd7b60ee1323a49625de	k__Bacteria	p__Firmicutes	c__Clostridia	o__Clostridiales	f__Lachnospiraceae	f__Lachnospiraceae	f__Lachnospiraceae
efbf5408f30f33f0e48752a9f7f6e2f1	k__Bacteria	p__Firmicutes	c__Clostridia	o__Clostridiales	o__Clostridiales	o__Clostridiales	o__Clostridiales
6325524764db1e4b1c2621a7005050df	k__Bacteria	p__Firmicutes	c__Clostridia	o__Clostridiales	o__Clostridiales	o__Clostridiales	o__Clostridiales
5fc798b1df3bcda5e68c5d88d8d39402	k__Bacteria	p__Firmicutes	c__Clostridia	o__Clostridiales	f__Lachnospiraceae	f__Lachnospiraceae	f__Lachnospiraceae
4e237c595da5cb9529b22d4795613121	k__Bacteria	p__Firmicutes	c__Clostridia	o__Clostridiales	f__Lachnospiraceae	g__[Ruminococcus]	s__gnavus
17ab34201671f799caffcc3d27b70a2c	k__Bacteria	p__Firmicutes	c__Clostridia	o__Clostridiales	f__Lachnospiraceae	f__Lachnospiraceae	f__Lachnospiraceae
12f07d39b6049f074dacb64f2cf6dd17	k__Bacteria	p__Firmicutes	c__Clostridia	o__Clostridiales	f__Ruminococcaceae	g__Ruminococcus	s__
0fdcb15125926008f79a128031b3448b	k__Bacteria	p__Firmicutes	c__Clostridia	o__Clostridiales	f__Ruminococcaceae	g__Oscillospira	s__
e77b45f3b1ed57017afa4dde72c06d94	k__Bacteria	p__Firmicutes	c__Clostridia	o__Clostridiales	f__Lachnospiraceae	f__Lachnospiraceae	f__Lachnospiraceae
4deceedb10921cb50692ef0e52bc2b5d	k__Bacteria	p__Firmicutes	c__Clostridia	o__Clostridiales	f__Ruminococcaceae	g__Oscillospira	s__
d08356dd9f482bb52a98464042add8e1	k__Bacteria	p__Bacteroidetes	c__Bacteroidia	o__Bacteroidales	f__Rikenellaceae	g__	s__
853cddc1b946f0d43a0716ac206af2bd	k__Bacteria	p__Firmicutes	c__Clostridia	o__Clostridiales	f__Lachnospiraceae	f__Lachnospiraceae	f__Lachnospiraceae
666fefaeb47f3141846c043009098eb6	k__Bacteria	p__Firmicutes	c__Clostridia	o__Clostridiales	o__Clostridiales	o__Clostridiales	o__Clostridiales
e0d0ce286702f8e3217154eab4e91648	k__Bacteria	p__Firmicutes	c__Clostridia	o__Clostridiales	o__Clostridiales	o__Clostridiales	o__Clostridiales
5869a42e31899d7780629f0716109cf5	k__Bacteria	p__Firmicutes	c__Clostridia	o__Clostridiales	f__Lachnospiraceae	f__Lachnospiraceae	f__Lachnospiraceae
a6ec8ace9ba7d81d66cdb368ea2981b7	k__Bacteria	p__Firmicutes	c__Clostridia	o__Clostridiales	f__Ruminococcaceae	g__Oscillospira	s__
c7257bd17077580eef9a39f461d4106d	k__Bacteria	p__Firmicutes	c__Clostridia	o__Clostridiales	f__Lachnospiraceae	f__Lachnospiraceae	f__Lachnospiraceae
02b4d5103d0d29c7276bb3b635ac7a69	k__Bacteria	p__Bacteroidetes	c__Bacteroidia	o__Bacteroidales	f__Bacteroidaceae	g__Bacteroides	s__ovatus
f4fac2a0b9f60fc53422f64f8e1c4fd5	k__Bacteria	p__Firmicutes	c__Clostridia	o__Clostridiales	f__Lachnospiraceae	f__Lachnospiraceae	f__Lachnospiraceae
1c6bc1a18afda1dc4316e54d7cecab99	k__Bacteria	p__Firmicutes	c__Clostridia	o__Clostridiales	o__Clostridiales	o__Clostridiales	o__Clostridiales
08b9e507c004c725c3b8a0c04bb4a7e4	k__Bacteria	p__Bacteroidetes	c__Bacteroidia	o__Bacteroidales	f__Rikenellaceae	g__	s__
2173688f3c2254db2cf905a6c350bf79	k__Bacteria	p__Firmicutes	c__Clostridia	o__Clostridiales	f__Ruminococcaceae	g__Oscillospira	s__
2d16b7f72c11e9b2bb521f49193629ec	k__Bacteria	p__Firmicutes	c__Clostridia	o__Clostridiales	f__Lachnospiraceae	f__Lachnospiraceae	f__Lachnospiraceae
579f3994836acb4e1cd9f65bde28630f	k__Bacteria	p__Firmicutes	c__Clostridia	o__Clostridiales	f__Lachnospiraceae	f__Lachnospiraceae	f__Lachnospiraceae
68f8f7604872a6d4fed9b2b43064aee4	k__Bacteria	p__Firmicutes	c__Clostridia	o__Clostridiales	f__Ruminococcaceae	g__Oscillospira	s__
8383a9394d839568543ff7a5decb1956	k__Bacteria	p__Firmicutes	c__Clostridia	o__Clostridiales	f__Ruminococcaceae	g__Oscillospira	s__
e9b2dd709e597470d2d8ded16c2bad44	k__Bacteria	p__Firmicutes	c__Clostridia	o__Clostridiales	f__Ruminococcaceae	g__Oscillospira	s__
9d5e0ad5255570159134088975331f19	k__Bacteria	p__Firmicutes	c__Clostridia	o__Clostridiales	f__Lachnospiraceae	g__	s__
d0593de616930935f60cd2556e37d1f4	k__Bacteria	p__Firmicutes	c__Clostridia	o__Clostridiales	f__Lachnospiraceae	f__Lachnospiraceae	f__Lachnospiraceae
4beac537c5c108a2b97d5929a49527ed	k__Bacteria	p__Firmicutes	c__Clostridia	o__Clostridiales	f__Lachnospiraceae	f__Lachnospiraceae	f__Lachnospiraceae
7ca8e4ee1186c7392d160a7dc543b6de	k__Bacteria	p__Firmicutes	c__Clostridia	o__Clostridiales	f__Lachnospiraceae	f__Lachnospiraceae	f__Lachnospiraceae
ddf507751b49961b729adbcef3eaf3c7	k__Bacteria	p__Firmicutes	c__Clostridia	o__Clostridiales	o__Clostridiales	o__Clostridiales	o__Clostridiales
0f3d5ab93a1bdff74c4c3fbe0ad3206b	k__Bacteria	p__Firmicutes	c__Clostridia	o__Clostridiales	f__Lachnospiraceae	g__[Ruminococcus]	s__gnavus
a6ecce04b6770ba62df9347a9855f8dd	k__Bacteria	p__Firmicutes	c__Clostridia	o__Clostridiales	f__Lachnospiraceae	f__Lachnospiraceae	f__Lachnospiraceae
a5e18fe88e3e8f269c2c33265c4060d6	k__Bacteria	p__Firmicutes	c__Clostridia	o__Clostridiales	f__Lachnospiraceae	g__	s__
